# Supplementary material
Source: Springer Nature journal article supplement (https://www.springermedizin.de/resource/supplementary/12882_2013_772_MOESM7_ESM.pdf/9454686)

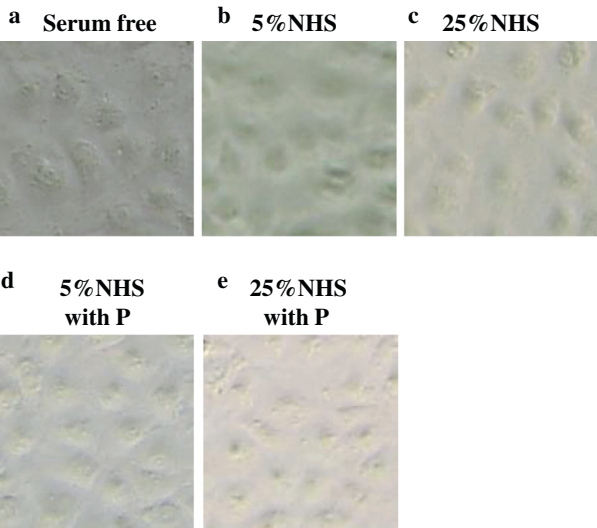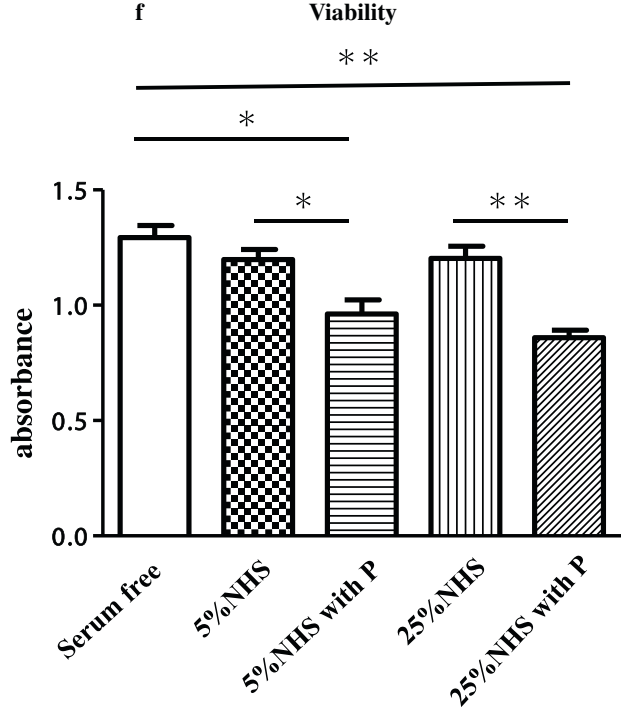

Supplement: MOESM7 [file 9454686]
